# Supplementary material
Source: PubMed Central journal article supplement (PMC6237227)
Supplement: jciinsight-3-121495-s208.pdf [file jciinsight-3-121495-s208.pdf]

**SUPPLEMENT**

**Figure 1. Participant flow diagram**

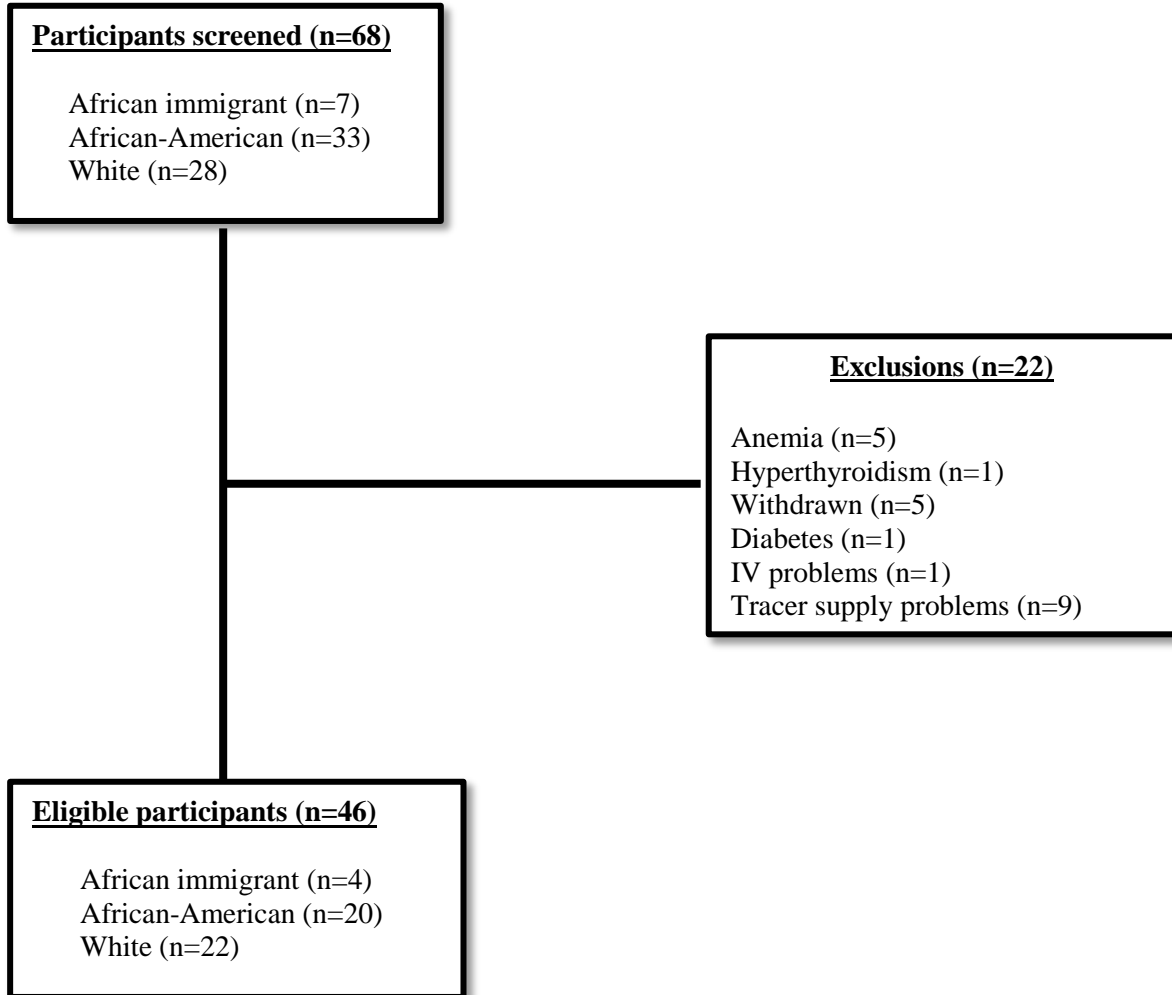

**Table 1. Characteristics of women with prediabetes by race**

| Variable                                                                         | Black (n=4)      | White (n=4)      | P-value |
|----------------------------------------------------------------------------------|------------------|------------------|---------|
| Age (years)                                                                      | 38±5             | 39±5             | 0.83    |
| BMI (kg/m <sup>2</sup> )                                                         | 29.6±3.2         | 31.7±2.6         | 0.62    |
| Waist circumference (cm)                                                         | 84.05±5.9        | 102.4±9.0        | 0.14    |
| <b>Body Composition and Fat Distribution</b>                                     |                  |                  |         |
| Total Fat mass (kg)                                                              | 39.9±9.4         | 38.3±5.9         | 0.89    |
| Total Lean body mass (kg)                                                        | 49.5±2.1         | 49.5±3.8         | 0.99    |
| Visceral Fat (cm <sup>3</sup> )                                                  | 36 (25-50)       | 131 (78-220)     | 0.05*   |
| Hepatic Fat (%)                                                                  | 0.5 (0.3-0.7)    | 7.0 (2.5-9.7)    | 0.03*   |
| <b>Metabolic Characteristics</b>                                                 |                  |                  |         |
| Fasting glucose (mg/dL)                                                          | 97.3±5.3         | 95.6±4.1         | 0.81    |
| 2-hour glucose (mg/dL)                                                           | 153.5±5.7        | 155±7.4          | 0.88    |
| Fasting insulin (mU/L)                                                           | 4 (3.9-4.4)      | 13.3 (6.3-20.1)  | 0.65    |
| Fasting triglyceride (mg/dL)                                                     | 43 (41-57)       | 126 (68-159)     | 0.10    |
| S <sub>I</sub> x 10 <sup>-4</sup> min <sup>-1</sup> (uU•ml <sup>-1</sup> )       | 3.26 (2.38-4.34) | 1.54 (1.48-2.98) | 0.20*   |
| AIRg (mU•L <sup>-1</sup> •ml <sup>-1</sup> )                                     | 523 (382-636)    | 473 (319-824)    | 0.97*   |
| Disposition index                                                                | 1482 (1209-1986) | 963 (709-1380)   | 0.15*   |
| <b>Basal energy expenditure</b>                                                  |                  |                  |         |
| REE (kcal•day <sup>-1</sup> )                                                    | 1340±117         | 1434±102         | 0.57    |
| REE (kcal•kg <sup>-1</sup> LBM•day <sup>-1</sup> )                               | 28.9±2.6         | 31.4±2.9         | 0.55    |
| RQ                                                                               | 0.86±0.02        | 0.82±0.03        | 0.24    |
| <b>Steady-state kinetic measurements</b>                                         |                  |                  |         |
| Glucose production rate (mg•kg <sub>LBM</sub> <sup>-1</sup> •min <sup>-1</sup> ) | 2.52±0.10        | 2.67±0.02        | 0.19    |
| Fractional Gluconeogenesis (%)                                                   | 0.56±0.07        | 0.72±0.03        | 0.14    |
| Gluconeogenesis (mg•kg <sub>LBM</sub> <sup>-1</sup> •min <sup>-1</sup> )         | 1.46±0.20        | 1.98±0.08        | 0.08    |
| Glycogenolysis (mg•kg <sub>LBM</sub> <sup>-1</sup> •min <sup>-1</sup> )          | 1.06±0.21        | 0.69±0.08        | 0.21    |
| Glycerol Ra (mg•kg <sub>LBM</sub> <sup>-1</sup> •min <sup>-1</sup> )             | 0.49±0.07        | 0.45±0.04        | 0.62    |

Data are presented as mean±SEM or median (25<sup>th</sup>-75<sup>th</sup> percentile). \*Natural log-transformed for analysis with unpaired student t-tests. BMI: body mass index, S<sub>I</sub>: whole-body insulin sensitivity, AIRg: acute insulin response to glucose, REE: resting energy expenditure, RQ: respiratory quotient, Ra (turnover).

**Table 2. Daily dietary energy intake and macronutrient composition by race**

|                      | <b>Black (n=23)</b> | <b>Whites (n=22)</b> | <b><i>P</i>-value</b> |
|----------------------|---------------------|----------------------|-----------------------|
| Energy (kcal)        | 2087±70             | 2141±132             | 0.71                  |
| Fiber (g/1000 kcal)  | 19±1                | 22±2                 | 0.20                  |
| Carbohydrate (g/day) | 246±10              | 238±18               | 0.70                  |
| Protein (g/day)      | 81±4                | 89±6                 | 0.31                  |
| Fat (g/day)          | 87±4                | 89±6                 | 0.76                  |
| Alcohol (g/day)      | 5±2                 | 11±3                 | 0.09                  |

Data collected from 3-7-day food records and presented as mean±SEM. Between group comparisons made with unpaired student's t-tests.

**Table 3. Daily physical activity levels by race**

| <b>Activity (min/day)</b> | <b>Black (n=24)</b> | <b>White (n=21)</b> | <b>P-value</b> |
|---------------------------|---------------------|---------------------|----------------|
| Light                     | 261±14              | 282±17              | 0.33           |
| Moderate-vigorous         | 25±4                | 30±3                | 0.32           |
| Total                     | 288±15              | 313±417             | 0.28           |

Data obtained by 5-7-day accelerometry and presented as mean±SEM. Between group comparisons made with unpaired student's t-tests. Activity measured in counts per minute (cpm): light (100-2019 cpm) and moderate-vigorous ( $\geq 2020$  cpm).

**Table 4. Isotopic enrichment under fasting and steady-state conditions.**

| Tracer                                                 | Enrichment (%) |              | P-value |
|--------------------------------------------------------|----------------|--------------|---------|
|                                                        | Black (n=24)   | White (n=22) |         |
| [6,6- <sup>2</sup> H <sub>2</sub> ]glucose             | 3.47±0.08      | 3.16±0.08    | 0.01    |
| <sup>2</sup> H in body water <sup>#</sup>              | 0.31±0.00      | 0.30±0.01    | 0.15    |
| Average <sup>2</sup> H per glucose carbon <sup>#</sup> | 0.18±0.01      | 0.20±0.01    | 0.03    |
| [ <sup>2</sup> H <sub>5</sub> ]glycerol                | 3.94±0.22      | 3.34±0.16    | 0.04    |

Data are presented as mean±SEM and groups compared by unpaired student's t-tests,  
<sup>#</sup> n=44
